# Supplementary material for: Self-assembly of corn-like Co3O4 from nanoparticles induced by graphene wrinkles and its application in lithium ion batteries
Source: Royal Society of Chemistry journal article supplement (doi:10.1039/d1se00180a), 2021-01-01
Supplement: d1se00180a1.pdf [file d1se00180a1.pdf]

## Supplementary Information

### Self-assembly of corn-like $\text{Co}_3\text{O}_4$ from nanoparticles induced by graphene wrinkles and its application in lithium ion batteries

Xiaoting Zhang<sup>\*a</sup>, Chengcheng Liu<sup>b</sup> and Rui Wang<sup>\*a</sup>

<sup>a</sup>Beijing Key Laboratory of Clothing Materials R & D and Assessment, Beijing Engineering Research Center of Textile Nanofiber, School of Materials Design & Engineering, Beijing Institute of Fashion Technology, Beijing 100029, China. E-mail: zhangxt@bift.edu.cn, clywangrui@bift.edu.cn

<sup>b</sup>Department of Chemistry, Tsinghua University, Beijing 100084, China.

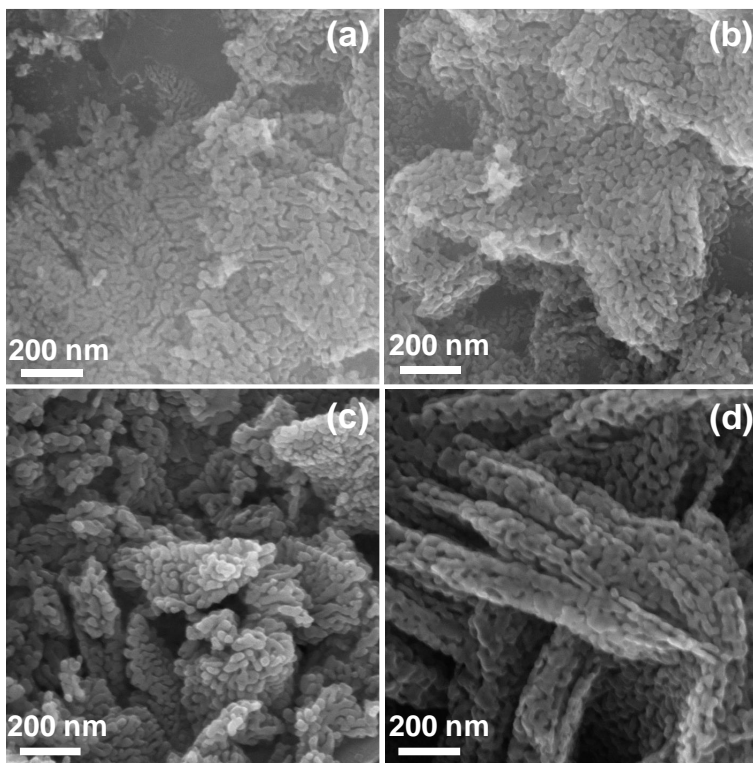

**Fig. S1** SEM images of (a)  $\text{Co}_3\text{O}_4/\text{GNSs-3}$ , (b)  $\text{Co}_3\text{O}_4/\text{GNSs-2}$ , (c)  $\text{Co}_3\text{O}_4/\text{GNSs-1}$  and (d)  $\text{Co}_3\text{O}_4/\text{GNSs}$ .

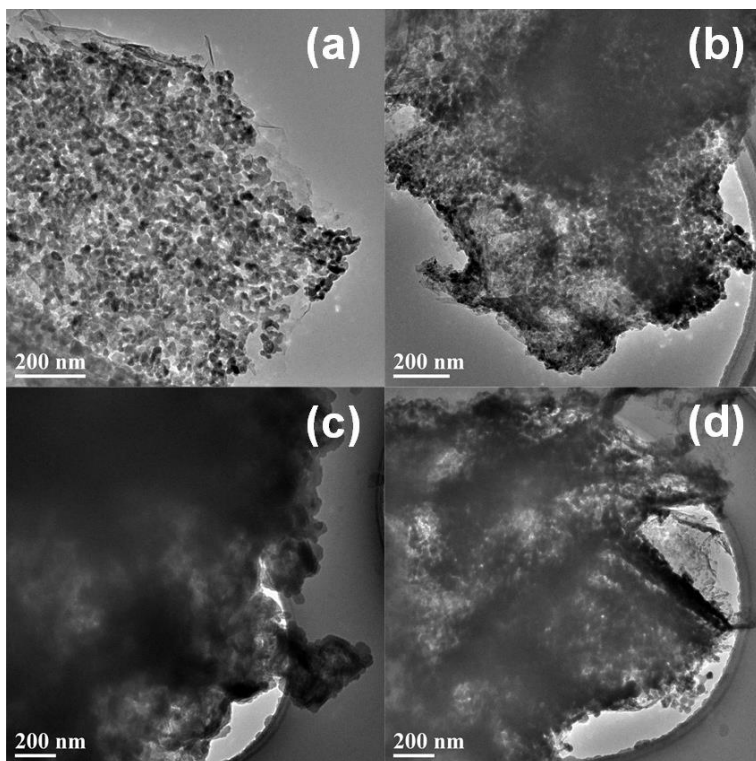

**Fig. S2** TEM images of (a) Co<sub>3</sub>O<sub>4</sub>/GNSs-3, (b) Co<sub>3</sub>O<sub>4</sub>/GNSs-2, (c) Co<sub>3</sub>O<sub>4</sub>/GNSs-1 and (d) Co<sub>3</sub>O<sub>4</sub>/GNSs.

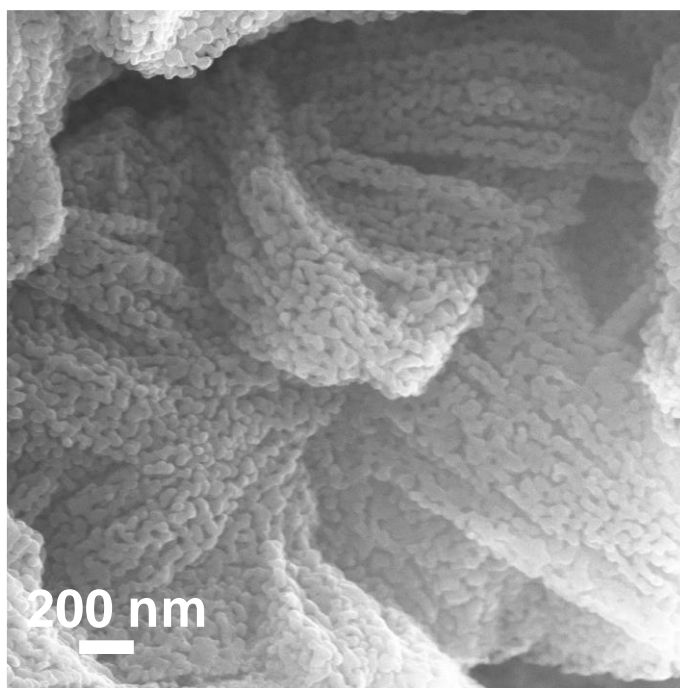

**Fig. S3** SEM image of Co<sub>3</sub>O<sub>4</sub>/GNSs after annealing at 500 °C for 3 h in the air.

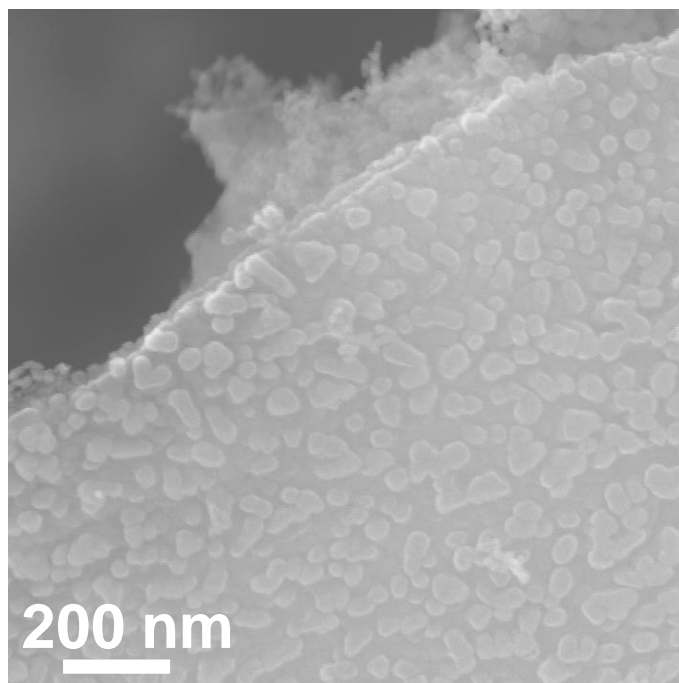

Fig. S4 SEM image of pure Co<sub>3</sub>O<sub>4</sub>.

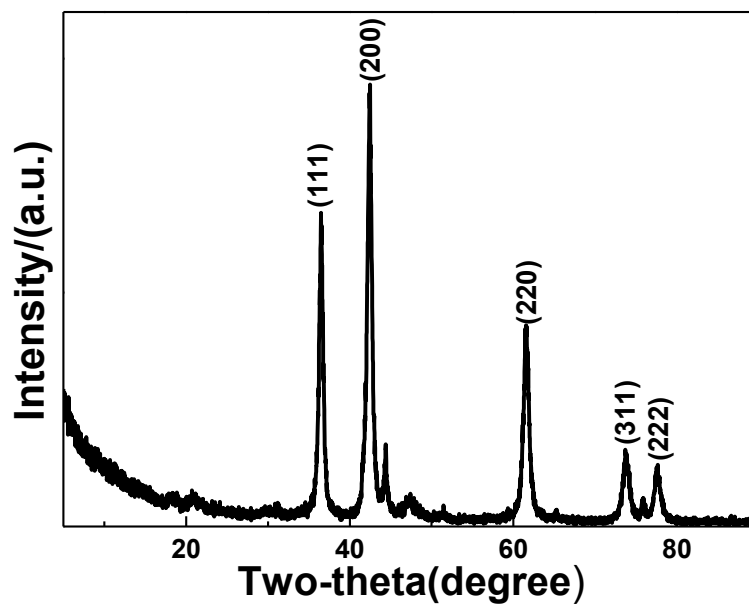

Fig. S5 XRD pattern of Co(NO<sub>3</sub>)<sub>2</sub> after annealing at 400 °C for 3 h in argon.

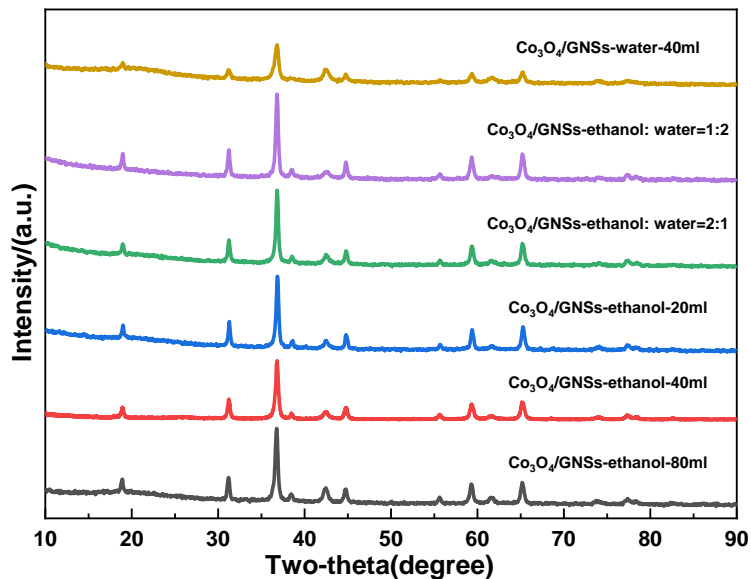

**Fig. S6** XRD patterns of  $\text{Co}_3\text{O}_4/\text{GNSs}$  prepared with different solvents.

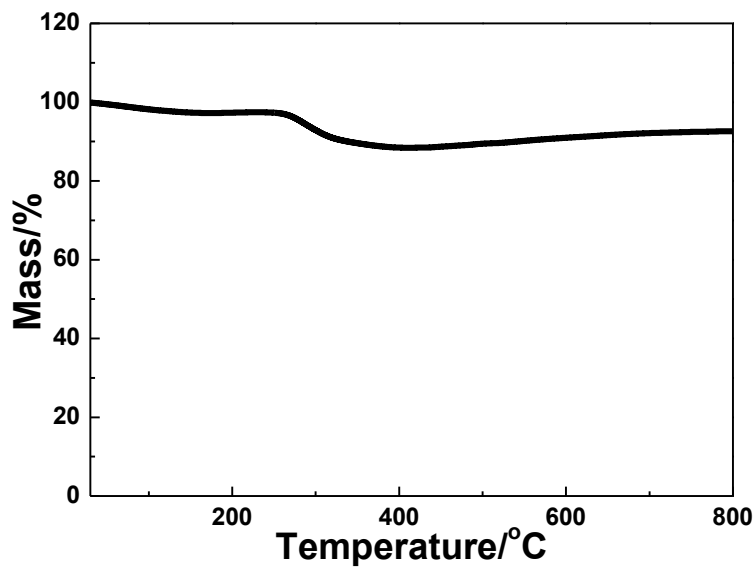

**Fig. S7** TG curve of  $\text{Co}_3\text{O}_4/\text{GNSs}$ .

According to the TG result, we can know the content of  $\text{Co}_3\text{O}_4$  and graphene are 93 % and 7 %, respectively. Therefore, the theoretical capacity of  $\text{Co}_3\text{O}_4/\text{GNSs}$  can be calculated based on the theoretical capacity of  $\text{Co}_3\text{O}_4$  ( $890 \text{ mAhg}^{-1}$ ) and first reversible capacity of GNSs ( $578 \text{ mAhg}^{-1}$ ).
